# Supplementary material
Source: PubMed Central journal article supplement (PMC2794992)
Supplement: NIHMS96644-supplement-Web_appendix.pdf [file NIHMS96644-supplement-Web_appendix.pdf]

# Web-based Supplementary Materials for “Group Testing Regression Models with Fixed and Random Effects”

Peng Chen,<sup>1</sup> Joshua M. Tebbs,<sup>1,\*</sup> and Christopher R. Bilder<sup>2</sup>

<sup>1</sup>Department of Statistics, University of South Carolina, Columbia, SC 29208, U.S.A.

<sup>2</sup>Department of Statistics, University of Nebraska, Lincoln, NE 68583, U.S.A.

\* *email*: tebbs@stat.sc.edu

## Web Appendix A: Description of the Metropolis-Hastings algorithm used within the MCEM algorithm in Section 2.2.

At the  $b$ th E-step iteration with parameter estimates  $\boldsymbol{\theta}^{(b)} = (\boldsymbol{\beta}^{(b)}, \boldsymbol{\varphi}^{(b)})$ , the random effect  $\mathbf{u}_i$  is generated from the conditional distribution  $f(\mathbf{u}_i | \mathbf{T}; \boldsymbol{\theta}^{(b)})$  as follows:

1. Start with  $\mathbf{u}_i^{(0)} = \mathbf{0}$ .
2. Generate a candidate point  $\mathbf{u}_i^{(*)}$  from the  $\mathcal{N}_q(\mathbf{0}, \mathbf{D}(\boldsymbol{\varphi}^{(b)}))$  proposal density.
3. Accept  $\mathbf{u}_i^{(*)}$  with probability

$$A(\mathbf{u}_i^{\text{old}}, \mathbf{u}_i^{(*)}) = \min \left\{ 1, \frac{\prod_{j=1}^{n_i} f_{ij}(c_{ij}, \mathbf{x}_{ij}, \mathbf{u}_i^{(*)}, \boldsymbol{\beta}^{(b)})}{\prod_{j=1}^{n_i} f_{ij}(c_{ij}, \mathbf{x}_{ij}, \mathbf{u}_i^{\text{old}}, \boldsymbol{\beta}^{(b)})} \right\}.$$

4. Return to Step 2.

After a sufficiently long “burn-in” period, we collect random draws  $\mathbf{u}_i^{(1)}, \mathbf{u}_i^{(2)}, \dots, \mathbf{u}_i^{(M)}$  using this algorithm. To estimate the information matrix in Section 2.3, we replace  $\boldsymbol{\beta}^{(b)}$  and  $\boldsymbol{\varphi}^{(b)}$  with  $\widehat{\boldsymbol{\beta}}$  and  $\widehat{\boldsymbol{\varphi}}$ , respectively, to sample from  $P(\mathbf{u} | \mathbf{T}; \widehat{\boldsymbol{\theta}})$ .

## Web Appendix B: Additional details on the derivation of the score statistic from Section 3.2.

Let  $\gamma_{12} = 1 - \gamma_1 - \gamma_2$  and define

$$\mu_{ij}(\boldsymbol{\beta}, \alpha_i) = \mu_{ij} \equiv \Pr(T_{ij} = 1 | \mathbf{x}_{ij}, v_i) = \gamma_1 + \gamma_{12} \prod_{k=1}^{c_{ij}} \{1 - g(\boldsymbol{\beta}' \mathbf{x}_{ijk} + \alpha_i)\}.$$

The derivatives of  $\mu_{ij}$  are given by

$$\begin{aligned}\mu_{ij}^{(1,0)} &\equiv \frac{\partial \mu_{ij}}{\partial \boldsymbol{\beta}} = \gamma_{12} \prod_{k=1}^{c_{ij}} \{1 - g(\boldsymbol{\beta}' \mathbf{x}_{ijk} + \alpha_i)\} \sum_{k=1}^{c_{ij}} \left\{ \frac{-\partial g(\boldsymbol{\beta}' \mathbf{x}_{ijk} + \alpha_i) / \partial \boldsymbol{\beta}}{1 - g(\boldsymbol{\beta}' \mathbf{x}_{ijk} + \alpha_i)} \right\} \mathbf{x}_{ijk} \\ \mu_{ij}^{(0,1)} &\equiv \frac{\partial \mu_{ij}}{\partial \alpha_i} = \gamma_{12} \prod_{k=1}^{c_{ij}} \{1 - g(\boldsymbol{\beta}' \mathbf{x}_{ijk} + \alpha_i)\} \sum_{k=1}^{c_{ij}} \left\{ \frac{-\partial g(\boldsymbol{\beta}' \mathbf{x}_{ijk} + \alpha_i) / \partial \alpha_i}{1 - g(\boldsymbol{\beta}' \mathbf{x}_{ijk} + \alpha_i)} \right\} \\ \mu_{ij}^{(0,2)} &\equiv \frac{\partial^2 \mu_{ij}}{\partial \alpha_i^2} = \mu_{ij}^{(0,1)} \sum_{k=1}^{c_{ij}} \left\{ \frac{-\partial g(\boldsymbol{\beta}' \mathbf{x}_{ijk} + \alpha_i) / \partial \alpha_i}{1 - g(\boldsymbol{\beta}' \mathbf{x}_{ijk} + \alpha_i)} \right\} \\ &\quad + \gamma_{12} \prod_{k=1}^{c_{ij}} \{1 - g(\boldsymbol{\beta}' \mathbf{x}_{ijk} + \alpha_i)\} \sum_{k=1}^{c_{ij}} \frac{\partial}{\partial \alpha_i} \left\{ \frac{-\partial g(\boldsymbol{\beta}' \mathbf{x}_{ijk} + \alpha_i) / \partial \alpha_i}{1 - g(\boldsymbol{\beta}' \mathbf{x}_{ijk} + \alpha_i)} \right\}.\end{aligned}$$

Define

$$W_{ij}(\boldsymbol{\beta}, \alpha_i) \equiv W_{ij} = \frac{T_{ij} - \mu_{ij}}{\mu_{ij}(1 - \mu_{ij})}.$$

It follows from the chain rule that

$$W_{ij}^{(0,1)} \equiv \frac{\partial W_{ij}}{\partial \alpha_i} = \frac{\mu_{ij}^{(0,1)}(-\mu_{ij}^2 - T_{ij} + 2\mu_{ij}T_{ij})}{\mu_{ij}^2(1 - \mu_{ij})^2}.$$

For  $i = 1, 2, \dots, l$ , we define the  $n_i \times 1$  vectors

$$\begin{aligned}\mathbf{T}_i &= (T_{i1}, T_{i2}, \dots, T_{in_i})' \\ \mathbf{W}_i &= (W_{i1}, W_{i2}, \dots, W_{in_i})',\end{aligned}$$

the  $n_i \times 1$  vectors

$$\begin{aligned}\boldsymbol{\mu}_{i(0,1)} &= (\mu_{i1}^{(0,1)}, \mu_{i2}^{(0,1)}, \dots, \mu_{in_i}^{(0,1)})' \\ \boldsymbol{\mu}_{i(0,2)} &= (\mu_{i1}^{(0,2)}, \mu_{i2}^{(0,2)}, \dots, \mu_{in_i}^{(0,2)})' \\ \mathbf{W}_{i(0,1)} &= (W_{i1}^{(0,1)}, W_{i2}^{(0,1)}, \dots, W_{in_i}^{(0,1)})',\end{aligned}$$

and the  $n_i \times p$  matrix  $\boldsymbol{\mu}_{i(1,0)} = (\boldsymbol{\mu}_{i1}^{(1,0)'}, \boldsymbol{\mu}_{i2}^{(1,0)'}, \dots, \boldsymbol{\mu}_{in_i}^{(1,0)'})'$ . With  $f_i = f_i(\mathbf{x}_i, 0, \boldsymbol{\beta})$ , it follows that  $(\partial / \partial \alpha_i) \log f_i = \mathbf{W}'_i \boldsymbol{\mu}_{i(0,1)}$ ,  $(\partial^2 / \partial \alpha_i^2) \log f_i = \mathbf{W}'_{i(0,1)} \boldsymbol{\mu}_{i(0,1)} + \mathbf{W}'_i \boldsymbol{\mu}_{i(0,2)}$ , and  $(\partial / \partial \boldsymbol{\beta}) \log f_i = \boldsymbol{\mu}'_{i(1,0)} \mathbf{W}_i$ . Thus,

$$\begin{aligned}S(\boldsymbol{\beta}) &= \frac{1}{2} \sum_{i=1}^l \left\{ \left( \frac{\partial \log f_i}{\partial \alpha_i} \right)^2 + \frac{\partial^2 \log f_i}{\partial \alpha_i^2} \right\} \\ &= \frac{1}{2} \sum_{i=1}^l \left\{ (\mathbf{W}'_i \boldsymbol{\mu}_{i(0,1)})^2 + \mathbf{W}'_{i(0,1)} \boldsymbol{\mu}_{i(0,1)} + \mathbf{W}'_i \boldsymbol{\mu}_{i(0,2)} \right\}.\end{aligned}$$

The expectations presented in Section 3.2 are

$$\begin{aligned}
I_{\tau\tau} &= \frac{1}{4} \sum_{i=1}^l E \left[ \left\{ (\mathbf{W}'_i \boldsymbol{\mu}_{i(0,1)})^2 + \mathbf{W}'_{i(0,1)} \boldsymbol{\mu}_{i(0,1)} + \mathbf{W}'_i \boldsymbol{\mu}_{i(0,2)} \right\}^2 \right] \\
\mathbf{I}_{\tau\beta} &= \frac{1}{2} \sum_{i=1}^l E \left[ \left\{ (\mathbf{W}'_i \boldsymbol{\mu}_{i(0,1)})^2 + \mathbf{W}'_{i(0,1)} \boldsymbol{\mu}_{i(0,1)} + \mathbf{W}'_i \boldsymbol{\mu}_{i(0,2)} \right\} \boldsymbol{\mu}'_{i(1,0)} \mathbf{W}_i \right] \\
\mathbf{I}_{\beta\beta} &= \sum_{i=1}^l E \left( \boldsymbol{\mu}'_{i(1,0)} \mathbf{W}_i \mathbf{W}'_i \boldsymbol{\mu}_{i(1,0)} \right) = \sum_{i=1}^l \boldsymbol{\mu}'_{i(1,0)} \mathbf{B}_i^{-1} \boldsymbol{\mu}_{i(1,0)},
\end{aligned}$$

where the  $n_i \times n_i$  matrix  $\mathbf{B}_i = \text{diag}[\mu_{ij}(1 - \mu_{ij})]$ . The formula for  $\mathbf{I}_{\beta\beta}$  has a closed-form representation, because  $\mathbf{W}_i$  has mean zero so that  $E(\mathbf{W}_i \mathbf{W}'_i) = \text{cov}(\mathbf{W}_i)$ . Expectations  $I_{\tau\tau}$  and  $\mathbf{I}_{\tau\beta}$  are not available in closed form, so we approximate their values under  $H_0$  as described in Section 3.2.
